# Supplementary material for: Synthesis of emissive water-soluble network polymers based on polyhedral oligomeric silsesquioxane and their application as optical sensors for discriminating the particle size
Source: Royal Society of Chemistry journal article supplement (doi:10.1039/c5tc03139g), 2015-01-01
Supplement: c5tc03139g1.pdf [file c5tc03139g1.pdf]

Supporting Information

# Synthesis of Emissive Water-Soluble Network Polymers Based on Polyhedral Oligomeric Silsesquioxane and Their Application as an Optical Sensor for Discriminating the Particle Size

*Takahiro Kakuta, Kazuo Tanaka\* and Yoshiki Chujo\**

Department of Polymer Chemistry, Graduate School of Engineering, Kyoto University, Katsura,  
Nishikyo-ku, Kyoto 615-8510, Japan

(Y. C.) [chujo@chujo.synchem.kyoto-u.ac.jp](mailto:chujo@chujo.synchem.kyoto-u.ac.jp)

(K. T.) [kazuo123@chujo.synchem.kyoto-u.ac.jp](mailto:kazuo123@chujo.synchem.kyoto-u.ac.jp)

## Characterization of POSS-BT(*n*).

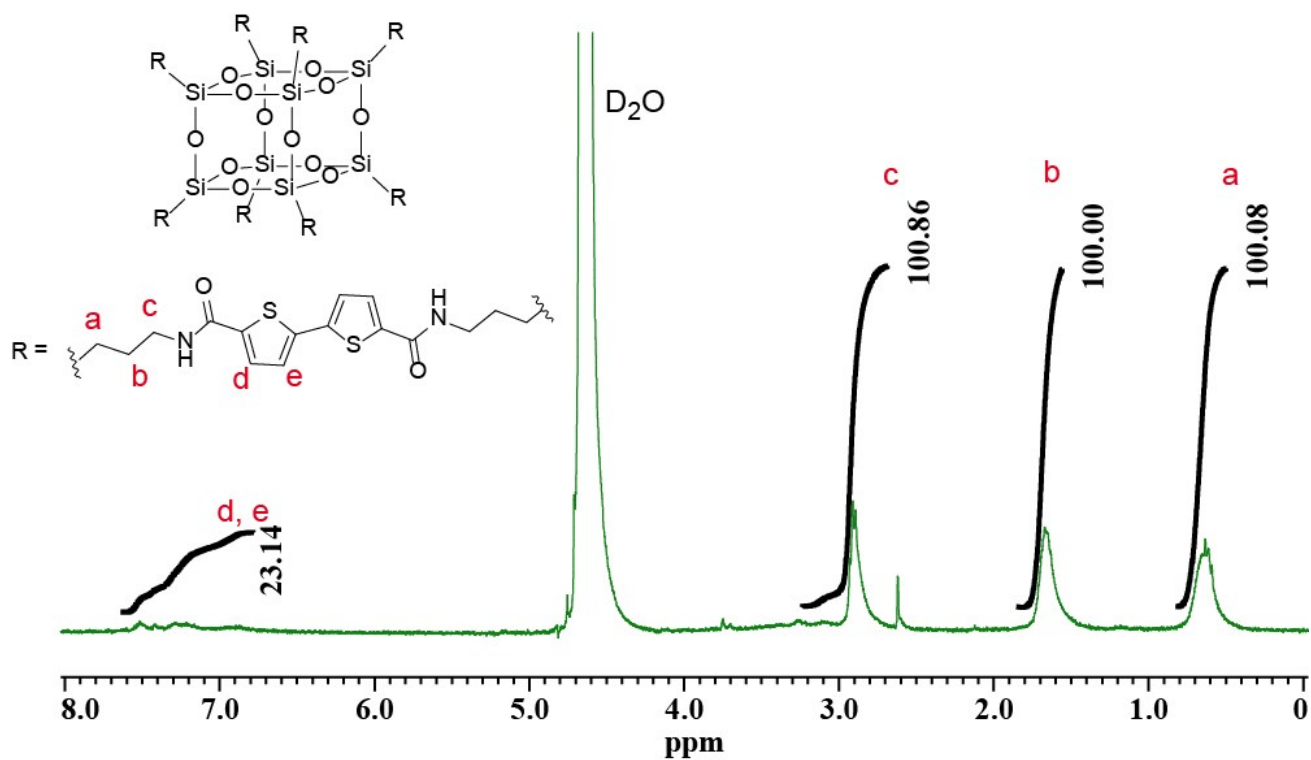

**Figure S1.** <sup>1</sup>H NMR spectrum of the POSS-BT(2) in D<sub>2</sub>O at 25 °C (400 MHz).

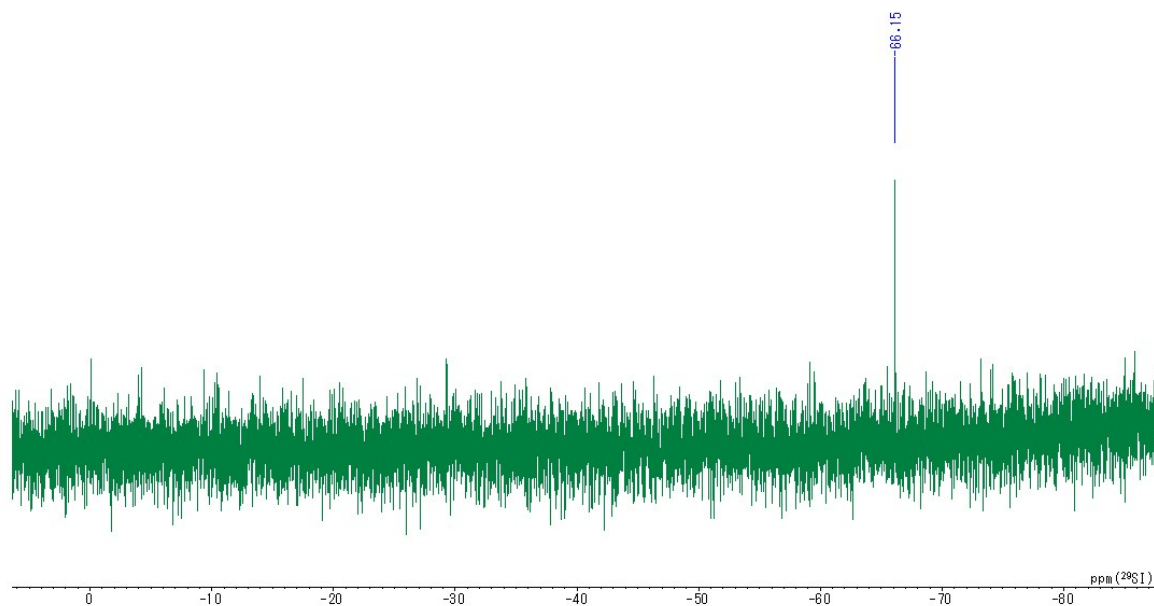

**Figure S2.** <sup>29</sup>Si NMR spectrum of the POSS-BT(2) in D<sub>2</sub>O at 25 °C (80 MHz).

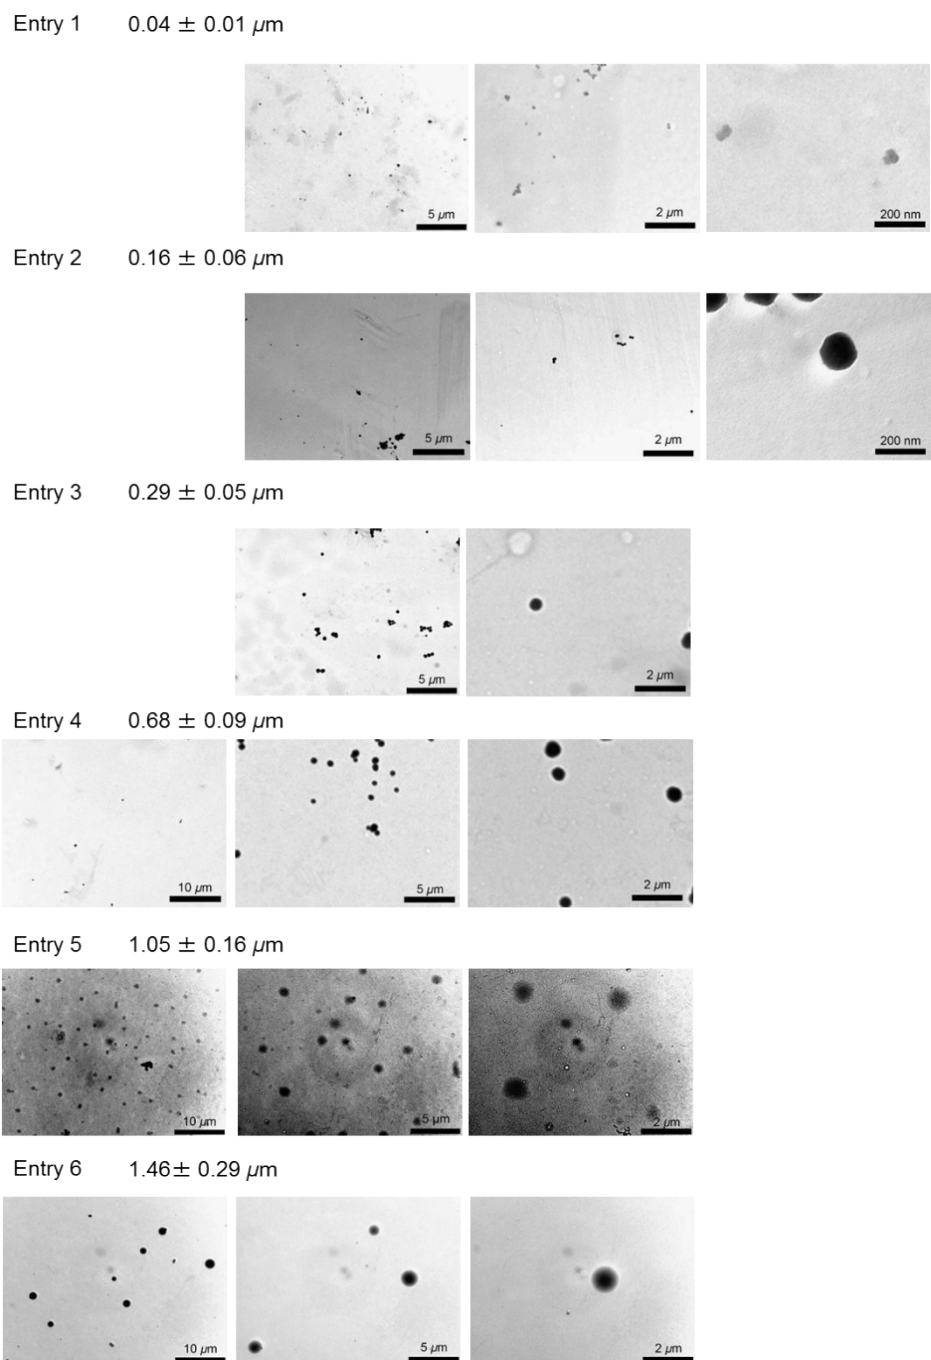

**Figure S3.** TEM images of silica particles. The diameters and size distributions were calculated as an average and a standard deviation with 100 particles in the TEM images, respectively.

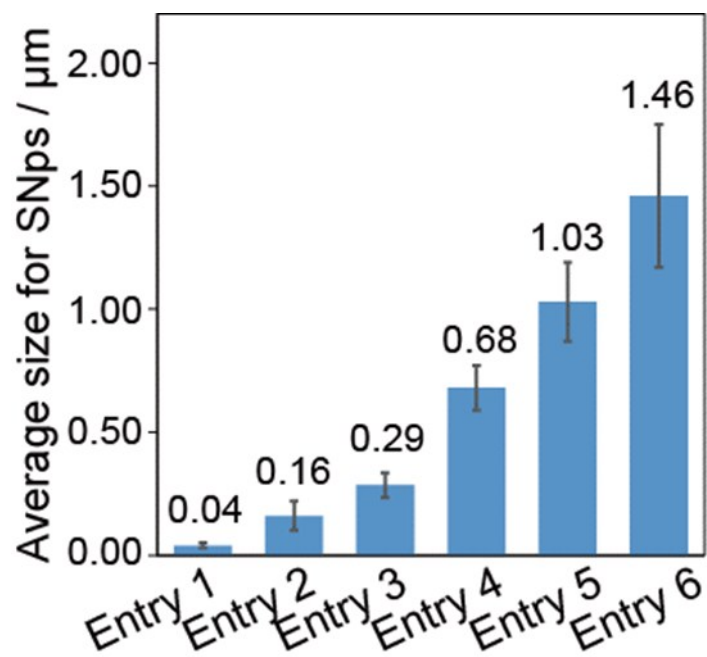

**Figure S4.** Averaged diameters and size dispersions of the SPs used in this study. The values were calculated with randomly-selected 100 particles observed in the TEM images.

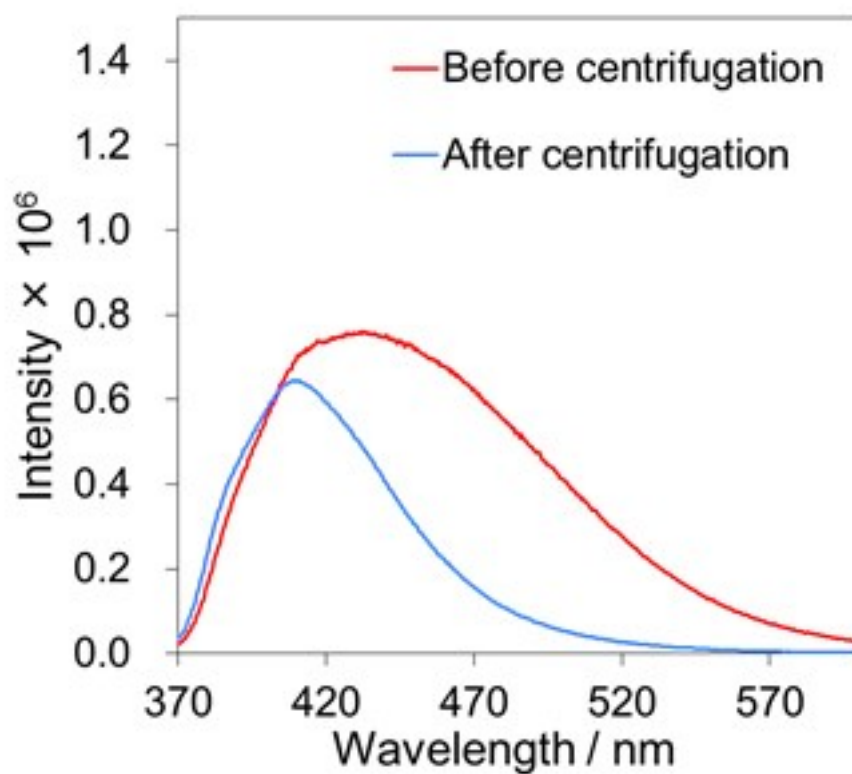

**Figure S5.** Typical emission spectra of the samples containing POSS-BT(2) and SPs before and after centrifugation.

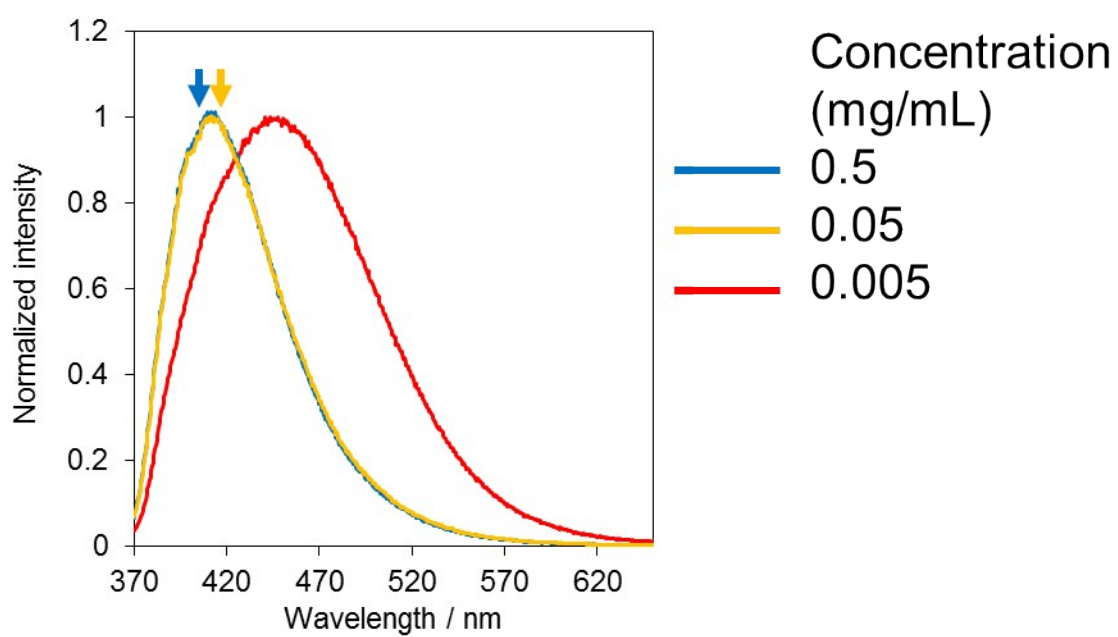

**Figure S6.** Influence of the concentration change of SPs in the samples on the emission peak from POSS-BT(2).
